# Supplementary material for: Structural basis of centromeric cohesion protection
Source: PubMed Central journal article supplement (PMC10279526; doi:10.1038/s41594-023-00968-y), 2023-04-20
Supplement: 41594_2023_968_MOESM2_ESM.pdf [file 41594_2023_968_MOESM2_ESM.pdf]

## Reporting Summary

Nature Portfolio wishes to improve the reproducibility of the work that we publish. This form provides structure for consistency and transparency in reporting. For further information on Nature Portfolio policies, see our [Editorial Policies](#) and the [Editorial Policy Checklist](#).

### Statistics

For all statistical analyses, confirm that the following items are present in the figure legend, table legend, main text, or Methods section.

n/a Confirmed

- The exact sample size ( $n$ ) for each experimental group/condition, given as a discrete number and unit of measurement
- A statement on whether measurements were taken from distinct samples or whether the same sample was measured repeatedly
- The statistical test(s) used AND whether they are one- or two-sided  
*Only common tests should be described solely by name; describe more complex techniques in the Methods section.*
- A description of all covariates tested
- A description of any assumptions or corrections, such as tests of normality and adjustment for multiple comparisons
- A full description of the statistical parameters including central tendency (e.g. means) or other basic estimates (e.g. regression coefficient) AND variation (e.g. standard deviation) or associated estimates of uncertainty (e.g. confidence intervals)
- For null hypothesis testing, the test statistic (e.g.  $F$ ,  $t$ ,  $r$ ) with confidence intervals, effect sizes, degrees of freedom and  $P$  value noted  
*Give  $P$  values as exact values whenever suitable.*
- For Bayesian analysis, information on the choice of priors and Markov chain Monte Carlo settings
- For hierarchical and complex designs, identification of the appropriate level for tests and full reporting of outcomes
- Estimates of effect sizes (e.g. Cohen's  $d$ , Pearson's  $r$ ), indicating how they were calculated

*Our web collection on [statistics for biologists](#) contains articles on many of the points above.*

### Software and code

Policy information about [availability of computer code](#)

**Data collection** Chromosome spreads were acquired using the Metafer system (Metasystems). Chromosome spreads images were blindly randomized by an in-house written ImageJ macro. Immunofluorescent and FISH images were taken using a Deltavision deconvolution microscope (Applied Precision) and image acquisition was done using Softworx (Applied Precision). Analysis of the mean SGO1 intensity in prometaphase cells was performed using an in-house written ImageJ macro.

**Data analysis** Molecular replacement was done with Phaser (Phenix 1.14-3260). Structure refinement was done with Phenix (1.14-3260). Computational models were calculated using AlphaFold v2.1.1. Structure building was done with COOT 0.8.0-3, Structure renderings were done with Pymol (2.2.3), Structure analysis was done with MolProbity (4.3), Gel band quantification was done with imageJ (1.8.0\_112), ITC data were analyzed with Origin 7.0. Graphical representation and analysis was done using Prism 9. For data analysis in Fig. We used ImageJ 1.52p

For manuscripts utilizing custom algorithms or software that are central to the research but not yet described in published literature, software must be made available to editors and reviewers. We strongly encourage code deposition in a community repository (e.g. GitHub). See the Nature Portfolio [guidelines for submitting code & software](#) for further information.

## Data

Policy information about [availability of data](#)

All manuscripts must include a [data availability statement](#). This statement should provide the following information, where applicable:

- Accession codes, unique identifiers, or web links for publicly available datasets
- A description of any restrictions on data availability
- For clinical datasets or third party data, please ensure that the statement adheres to our [policy](#)

Coordinates for the SA2-SCC1-SGO1 complex are available from the PDB (PDB ID 7ZJS). Any other relevant data are available from the corresponding authors upon reasonable request.

## Human research participants

Policy information about [studies involving human research participants and Sex and Gender in Research](#).

Reporting on sex and gender

N/A

Population characteristics

N/A

Recruitment

N/A

Ethics oversight

N/A

Note that full information on the approval of the study protocol must also be provided in the manuscript.

## Field-specific reporting

Please select the one below that is the best fit for your research. If you are not sure, read the appropriate sections before making your selection.

- Life sciences       Behavioural & social sciences       Ecological, evolutionary & environmental sciences

For a reference copy of the document with all sections, see [nature.com/documents/nr-reporting-summary-flat.pdf](https://www.nature.com/documents/nr-reporting-summary-flat.pdf)

## Life sciences study design

All studies must disclose on these points even when the disclosure is negative.

Sample size

For biochemical experiments, population sample size statistics do not apply. For Figures showing GST-pulldown analyses (Fig.1, Extended Data Fig. 1), appropriate controls are used to compare binding side-by-side. Wherever statistics have been derived, the number of repeat measurements and their consistency is mentioned in the figure legends.

Data exclusions

No data was excluded from the analysis.

Replication

We have indicated the number of repeat measurements made and consistency of the results obtained in the figure legends. All attempts the results were successful.

Randomization

For phenotype calling experiments were randomized.

Blinding

Investigators were blinded to allocation during experiments and outcome assessment.

## Reporting for specific materials, systems and methods

We require information from authors about some types of materials, experimental systems and methods used in many studies. Here, indicate whether each material, system or method listed is relevant to your study. If you are not sure if a list item applies to your research, read the appropriate section before selecting a response.

## Materials &amp; experimental systems

## Methods

|                                     |                                                           |
|-------------------------------------|-----------------------------------------------------------|
| n/a                                 | Included in the study                                     |
| <input type="checkbox"/>            | <input checked="" type="checkbox"/> Antibodies            |
| <input type="checkbox"/>            | <input checked="" type="checkbox"/> Eukaryotic cell lines |
| <input checked="" type="checkbox"/> | <input type="checkbox"/> Palaeontology and archaeology    |
| <input checked="" type="checkbox"/> | <input type="checkbox"/> Animals and other organisms      |
| <input checked="" type="checkbox"/> | <input type="checkbox"/> Clinical data                    |
| <input checked="" type="checkbox"/> | <input type="checkbox"/> Dual use research of concern     |

|                                     |                                                    |
|-------------------------------------|----------------------------------------------------|
| n/a                                 | Included in the study                              |
| <input checked="" type="checkbox"/> | <input type="checkbox"/> ChIP-seq                  |
| <input type="checkbox"/>            | <input checked="" type="checkbox"/> Flow cytometry |
| <input checked="" type="checkbox"/> | <input type="checkbox"/> MRI-based neuroimaging    |

## Antibodies

## Antibodies used

The following antibodies were used as primary antibodies for immunofluorescence microscopy: SGO1 (SAB1405371, Sigma Aldrich), GFP (ab290, Abcam), and CENP-A (07-574, Millipore, and ab13939, Abcam). For immunoblotting the following primary antibodies were used: SA1 (ab4457, Abcam), SA2 (A300-158a, Bethyl laboratories), SMC1 (A300-055A, Bethyl Laboratories), SCC1 (05-908, Millipore), WAPL (A-7, sc-365189, Santa Cruz), Sororin (ab192237, Abcam), HSP90 (sc-13119(F-8), Santa Cruz), and tubulin (T5168, Sigma Aldrich). For coimmunoprecipitation we used SMC1(A300-055A, Bethyl Laboratories) or IgG (2729S, Cell Signaling). Secondary antibodies were used at a 1:1000 dilution. For immunofluorescence microscopy we used: Alexa FlourTM 488 goat anti-mouse, Alexa FlourTM 568 goat anti-mouse, Alexa FlourTM 488 goat anti-rabbit, and Alexa FlourTM 568 goat anti-rabbit (Life Technology). For western blots, we used the following secondary antibodies: anti-goat-PO and goat anti-mouse-PO (DAKO).

## Validation

SGO1 : <https://www.sigmaaldrich.com/NL/en/product/sigma/sab1405371>  
 GFP: <https://www.abcam.com/gfp-antibody-ab290.html>  
 CENP-A: [https://www.merckmillipore.com/NL/en/product/Anti-CENP-A-Antibody,MM\\_NF-07-574](https://www.merckmillipore.com/NL/en/product/Anti-CENP-A-Antibody,MM_NF-07-574)  
 CENP-A: <https://www.abcam.com/cenpa-antibody-3-19-chip-grade-ab13939.html>  
 SA1: <https://www.abcam.com/sa1-antibody-ab4457.html>  
 SA2: <https://www.fortislife.com/products/primary-antibodies/goat-anti-sa2-antibody/BETHYL-A300-158>  
 WAPL: <https://www.scbt.com/p/wapl-antibody-a-7>  
 HSP90: <https://www.scbt.com/p/hsp-90alpha-beta-antibody-f-8>  
 SMC1: <https://www.thermofisher.com/antibody/product/SMC1-Antibody-Polyclonal/A300-055A>  
 Sororin: <https://www.abcam.com/cdca5-antibody-epr16331-c-terminal-ab192237.html>  
 Tubulin: <https://www.sigmaaldrich.com/NL/en/product/sigma/t5168>

## Eukaryotic cell lines

Policy information about [cell lines and Sex and Gender in Research](#)

## Cell line source(s)

HAP1 wild type from Carette et al., Nature 2011 gift from the authors.  
 HAP1 SGO1Y335A/F337A, SA1 W337A and SA2 W334A generated in this study in HAP1 wild type background cells using CRISPR/Cas gene editing. SA1 W337A/SA2 W334A generated in this study in a HAP1 SA2 W334A background cells using CRISPR/Cas gene editing.

## Authentication

Karyotyping. Point mutations were authenticated by Sanger sequencing

## Mycoplasma contamination

All the cell lines were confirmed negative for mycoplasma contamination

Commonly misidentified lines  
(See [ICLAC](#) register)

No commonly misidentified line was used

## Flow Cytometry

## Plots

Confirm that:

- The axis labels state the marker and fluorochrome used (e.g. CD4-FITC).
- The axis scales are clearly visible. Include numbers along axes only for bottom left plot of group (a 'group' is an analysis of identical markers).
- All plots are contour plots with outliers or pseudocolor plots.
- A numerical value for number of cells or percentage (with statistics) is provided.

## Methodology

## Sample preparation

Cells were incubated in Nicoletti buffer

## Instrument

Cell were analyzed by flow cytometry (BD LSRFortessaTM).

Software

Plots were generated with FlowJo (v.10)

Cell population abundance

We did not quantify the abundance of the G2 population

Gating strategy

Cells were gated into single cells and plotted in a histogram

Tick this box to confirm that a figure exemplifying the gating strategy is provided in the Supplementary Information.
