# Supplementary material for: Structural basis of centromeric cohesion protection
Source: PubMed Central journal article supplement (PMC10279526; doi:10.1038/s41594-023-00968-y), 2023-04-20
Supplement: 41594_2023_968_MOESM6_ESM.pdf [file 41594_2023_968_MOESM6_ESM.pdf]

Extended Data Fig. 6.

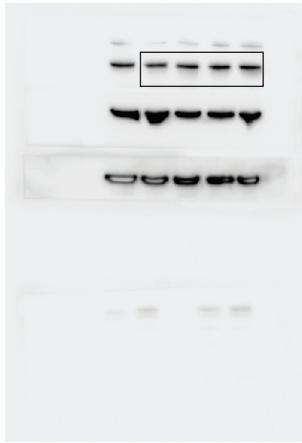

Rabbit-anti-SMC1

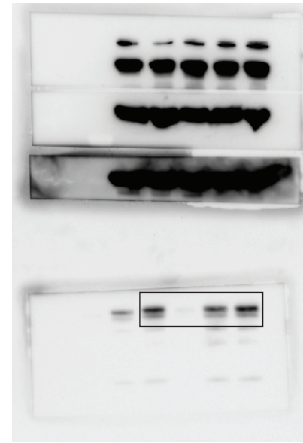

Rabbit-anti-Sororin

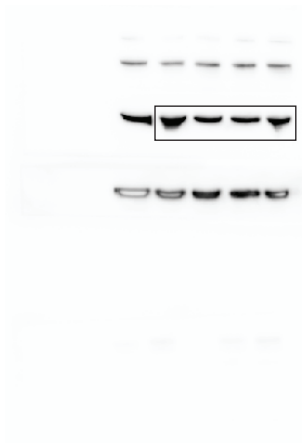

Mouse-anti-Hsp90
